# Supplementary material
Source: PubMed Central journal article supplement (PMC2897498)

Table S1

Oligonucleotide probes used in this study (\* number of reference strains that have had tested)

| No | Specificity                                                   | Position Code | Sequence [5'-3']              | Length (base) | GC (%) | Tm (°C) | * 87 | No.                       |
|----|---------------------------------------------------------------|---------------|-------------------------------|---------------|--------|---------|------|---------------------------|
| 1  | Fungi universal                                               | B2            | AACTTTCAACAACGGATCTCTTGGTTCT  | 28            | 39.3   | 67.4    |      |                           |
|    |                                                               | B3            | GCATCGATGAAGAACGCAGCGA        | 22            | 54.5   | 66.5    |      |                           |
|    |                                                               | B4            | GTGAATCATCGAATCTTTGAACGCACA   | 27            | 40.7   | 66.6    |      |                           |
|    |                                                               | B5            | ATCTCTTGGTTCTCGCATCGATGAAG    | 26            | 46.2   | 66.7    |      |                           |
|    |                                                               | B6            | AATCATCGAGTCTTTGAACGCAGCTT    | 26            | 42.3   | 67.2    |      |                           |
| 2  | Filamentous fungi universal                                   | C2            | GTTGACCTCGGATCAGGTAGGGAT      | 24            | 54.2   | 66.5    |      |                           |
| 3  | Trichophyton group universal                                  | C3            | TTCGAGCGTCATTTCAACCCCTC       | 23            | 52.2   | 66.1    |      |                           |
| 4  | <i>Candida albicans</i><br>( <i>C. albicans</i> )             | D2            | TCTTTGAAACAAACTTGCTTTGGCGG    | 26            | 42.3   | 67.3    | 4    | ATCC 10231                |
|    |                                                               | D3            | CCGCCAGAGGTCTAAACTTACAACC     | 25            | 52.0   | 66.7    |      | ATCC 10261                |
|    |                                                               | D4            | GACGGTAGTGGTAAGGCGGGAT        | 22            | 59.1   | 66.4    |      | ATCC 20260                |
|    |                                                               | D5            | GGCGGTAACGTCCACCACGTAT        | 22            | 59.1   | 67.4    |      | ATCC 18804                |
| 5  | <i>Candida dubliniensis</i><br>( <i>C. dubliniensis</i> )     | E2            | TGTGTTTTGTTCTGGACAAACTTGCTTTG | 29            | 37.9   | 68.1    | 3    | MYA-179                   |
|    |                                                               | E3            | CTGCCGCCAGAGGACATAAACTTAC     | 25            | 52.0   | 67.0    |      | MYA-180                   |
|    |                                                               | E4            | TAGTGGTATAAGGCGGAGATGCTTGA    | 26            | 46.2   | 67.0    |      | MYA-646                   |
|    |                                                               | E5            | TCTGGCGTCGCCCATTTTATTCTTC     | 25            | 48.0   | 67.2    |      |                           |
| 6  | <i>Candida glabrata</i><br>( <i>C. glabrata</i> )             | F2            | GGTGTTTTATCACACGACTCGACACT    | 26            | 46.2   | 66.9    | 4    | ATCC 60406                |
|    |                                                               | F3            | GGAGTTCTCCCAGTGGATGCAAAC      | 24            | 54.2   | 66.8    |      | ATCC 64677                |
|    |                                                               | F4            | GGCCATATCAGTATGTGGGACACG      | 24            | 54.2   | 66.2    |      | ATCC 28226                |
|    |                                                               | F5            | AGGTTTTACCAACTCGGTGTTGATCTAG  | 28            | 42.9   | 67.0    |      | ATCC 2001                 |
| 7  | <i>Candida guilliermondii</i><br>( <i>C. guilliermondii</i> ) | G2            | GCTTAACTGCGCGGCGAAAAAC        | 22            | 54.5   | 66.6    | 4    | ATCC 22948                |
|    |                                                               | G3            | AGATAGGTTGGGCCAGAGGTTTAAACA   | 26            | 46.2   | 67.4    |      | ATCC 32542                |
|    |                                                               | G4            | TCTTAGTCGGAAGTGGCGTTTGCTT     | 25            | 48.0   | 67.4    |      | ATCC 38290                |
|    |                                                               | G5            | TCGTTGAATGGTGTGGCGGGAT        | 22            | 54.5   | 67.4    |      | ATCC 6260                 |
| 8  | <i>Candida intermedia</i><br>( <i>C. intermedia</i> )         | H2            | GTGTTGCCTTCCGAAATATCACAGTTG   | 27            | 44.4   | 66.9    | 3    | ATCC 12089                |
|    |                                                               | H3            | CAGTTGTCGCAATACGTTACTTCAACTTT | 29            | 37.9   | 67.1    |      | ATCC 201070<br>ATCC 36352 |
| 9  | <i>Candida kefyr</i><br>( <i>C. kefyr</i> )                   | H4            | GCGGCCAGTTCTTGATTCTCTGC       | 23            | 56.5   | 67.2    | 3    | ATCC 8572                 |
|    |                                                               | H5            | AGCTCGTCTCTCCAGTGGACATAAAC    | 26            | 50.0   | 67.8    |      | ATCC 8628                 |
|    |                                                               | H6            | TTGAAAGTGGCTAGCCGTTGCC        | 22            | 54.5   | 66.5    |      | ATCC 8654                 |
|    |                                                               | H7            | TCGTGGTAAGCTTGGGTCATAGAGAC    | 26            | 50.0   | 67.6    |      |                           |
| 10 | <i>Candida krusei</i><br>( <i>C. krusei</i> )                 | I2            | AGCGGAACGAAAACAACAACACCT      | 24            | 45.8   | 67.1    | 3    | JCM 1608                  |
|    |                                                               | I3            | ACCTAGTGTGAATTGCAGCCATCG      | 24            | 50.0   | 66.6    |      | JCM 2341                  |
|    |                                                               | I4            | GACGTGTAAGAGCGTCGGAGC         | 22            | 59.1   | 66.2    |      | JCM 2284                  |
|    |                                                               | I5            | GCGAGTGTGCGAGACAACAAAAG       | 25            | 48.0   | 67.1    |      |                           |
| 11 | <i>Candida lusitanae</i><br>( <i>C. lusitanae</i> )           | I6            | CTCGAGGCATTCTCGAGGCAT         | 22            | 59.1   | 67.0    | 3    | ATCC 24347                |
|    |                                                               | I7            | AGGCGTTGCTCCGAAATATCAACC      | 24            | 50.0   | 66.9    |      | ATCC 24348<br>ATCC 96040  |
| 12 | <i>Candida parapsilosis</i><br>( <i>C. parapsilosis</i> )     | J2            | TGGGGCCTGCCAGAGATTAAGT        | 23            | 52.2   | 66.8    | 4    | ATCC 10233                |
|    |                                                               | J3            | GTGTTGAGCGATACGCTGGGTTT       | 23            | 52.2   | 66.6    |      | ATCC 14054                |
|    |                                                               | J4            | GTTTTTCCACTCATTGGTACAACTCCA   | 29            | 37.9   | 67.0    |      | ATCC 28473<br>ATCC 28480  |
| 13 | <i>Candida tropicalis</i><br>( <i>C. tropicalis</i> )         | J5            | ACCGCCAGAGGTTATAACTAAACCAA    | 27            | 40.7   | 66.5    | 3    | ATCC 46535                |
|    |                                                               | J6            | GAGCAATACGCTAGGTTTGTGAAAGAA   | 29            | 37.9   | 67.0    |      | ATCC 38773                |
|    |                                                               | J7            | ACGCTTATTTGCTAGTGGCCACC       | 24            | 50.0   | 67.1    |      | ATCC 32546                |

Table S1(continue)

|    |                                                                                                                              |     |                               |    |      |      |   |             |
|----|------------------------------------------------------------------------------------------------------------------------------|-----|-------------------------------|----|------|------|---|-------------|
| 14 | <i>Epidermophyton floccosum</i><br>( <i>E. floccosum</i> )                                                                   | K2  | TCTCTCTGAATGCTGGACGGTGTC      | 24 | 54.2 | 67.3 | 3 | ATCC 52065  |
|    |                                                                                                                              | K3  | CTCGCCGAAGGAGTGATTCTCAGA      | 24 | 54.2 | 67.1 |   | ATCC 38486  |
|    |                                                                                                                              | K4  | TTCCACCGGGGAGAGGAGAAAGG       | 22 | 59.1 | 66.1 |   | ATCC 52063  |
|    |                                                                                                                              | K5  | ACAAAACCAGCGCCTTCAGGAC        | 22 | 54.5 | 66.4 |   |             |
| 15 | <i>Microsporum canis</i><br>( <i>M. canis</i> )                                                                              | K6  | CCTGAGGGGGACTCTTGTTTCCT       | 23 | 56.5 | 66.5 | 5 | ATCC 52067  |
|    |                                                                                                                              | K7  | CGCCGGAGGATTACTCTGGAAAAC      | 24 | 54.2 | 66.6 |   | ATCC 42559  |
| 16 | <i>Arthroderma incurvatum</i><br>( <i>A. incurvatum</i> )                                                                    | L2  | TGGGCAATAACCAGCGCCTCTA        | 22 | 54.5 | 66.7 | 2 | ATCC 28327  |
|    |                                                                                                                              | L3  | TCAGGGATGCATTTCTCTGCGAATC     | 25 | 48.0 | 66.8 |   | ATCC 28328  |
| 17 | <i>Arthroderma gypseum</i><br>( <i>A. gypseum</i> )                                                                          | L4  | GTCCGGGGACAATCAACTCCCT        | 22 | 59.1 | 66.6 | 3 | MYA-892     |
|    |                                                                                                                              | L5  | AATCCATGAATACTGTTCCGTCTGAGC   | 27 | 44.4 | 67.0 |   | ATCC 24005  |
|    |                                                                                                                              | L6  | GGCCGGTTTTCTGGCCTAGTTTT       | 23 | 52.2 | 66.7 |   | ATCC 24006  |
| 18 | <i>Arthroderma benhamiae</i><br>( <i>A. benhamiae</i> )                                                                      | M2  | AGCCTCTTTGGGGGCTTTAGCT        | 22 | 54.5 | 66.7 | 4 | ATCC 16781  |
|    |                                                                                                                              | M3  | ACAGACATCAAAAAATCTTGAAAGCTGT  | 29 | 34.5 | 66.8 |   | ATCC 16782  |
|    |                                                                                                                              | M4  | CTGGGCGAATGGGCAGTCAAAC        | 22 | 59.1 | 67.1 |   | ATCC 52015  |
|    |                                                                                                                              | M5  | CTCTGGCCTTCCCCCAAATCTC        | 22 | 59.1 | 65.3 |   | ATCC 52018  |
| 19 | <i>Arthroderma vanbreuseghemii</i><br>( <i>A. vanbreuseghemii</i> )                                                          | M6  | TCTCTTTAGTGGCTCAACGCTGGA      | 24 | 50.0 | 67.1 | 2 | ATCC 28145  |
|    |                                                                                                                              | M7  | GGACAGACGCAAAAAAATTCTTTCAGAAG | 29 | 37.9 | 66.5 |   | ATCC 28146  |
| 20 | <i>Trichophyton mentagrophytes</i><br>var. <i>interdigitale</i><br>( <i>T. mentagrophytes</i> var.<br><i>interdigitale</i> ) | F9  | CCTCTCTTTAGTGGCTAAACGCTGG     | 25 | 52.0 | 66.7 | 2 | IFM 55365   |
|    |                                                                                                                              | F10 | CGCCCTGGCCTCAAAAATCTGTT       | 22 | 54.5 | 66.3 |   | IFM 55366   |
| 21 | <i>Trichophyton rubrum</i><br>( <i>T. rubrum</i> )                                                                           | N2  | CTTCTGGGAGCCTCGAGCCG          | 20 | 70.0 | 66.6 | 4 | ATCC 52021  |
|    |                                                                                                                              | N3  | AGACACCAAGAAAAAATTCTCTGAAGAGC | 29 | 37.9 | 66.6 |   | ATCC 52024  |
|    |                                                                                                                              | N4  | GAATGGGCAGCCAATTCAGCGC        | 22 | 59.1 | 68.0 |   | ATCC 14001  |
| 22 | <i>Trichophyton tonsurans</i><br>( <i>T. tonsurans</i> )                                                                     | N5  | CGGCGAGCCTCTCTTTATAGCG        | 22 | 59.1 | 65.6 | 4 | ATCC 10218  |
|    |                                                                                                                              | N6  | CCTCTCTTTATAGCGGCTCAACGC      | 24 | 54.2 | 66.7 |   | ATCC 32504  |
|    |                                                                                                                              | N7  | GGCTTTCTAGGCGAATGGGCAA        | 22 | 54.5 | 66.1 |   | ATCC 14000  |
| 23 | <i>Trichophyton verrucosum</i><br>( <i>T. verrucosum</i> )                                                                   | O2  | AGGACAGACATCAAAAAATCTTGAAGAGC | 29 | 37.9 | 66.6 | 3 | ATCC 10217  |
|    |                                                                                                                              | O3  | AAGCTCGGCTTGTGTGATGGAC        | 22 | 54.5 | 66.0 |   | ATCC 44690  |
| 24 | <i>Trichophyton violaceum</i><br>( <i>T. violaceum</i> )                                                                     | O4  | ACACCAAGGAAAATTCTCTGAAGGGC    | 26 | 46.2 | 67.3 | 3 | ATCC 28943  |
|    |                                                                                                                              | O5  | CCAAGGAAAATTCTCTGAAGGGCTGT    | 26 | 46.2 | 67.1 |   | ATCC 52319  |
| 25 | <i>Trichosporon asahii</i><br>( <i>T. asahii</i> )                                                                           | D6  | GTTCTACTACTTGACGCAAGTCGAGT    | 26 | 46.2 | 66.2 | 3 | ATCC 58163  |
|    |                                                                                                                              | D7  | TTGGGCGTCTGCGATTTCTGATC       | 23 | 52.2 | 66.5 |   | ATCC 24787  |
| 26 | <i>Trichosporon cutaneum</i><br>( <i>T. cutaneum</i> )                                                                       | E6  | TGAACTGTTGATTGACTTCGGTCAATTGA | 29 | 37.9 | 67.8 | 3 | ATCC 62858  |
|    |                                                                                                                              | E7  | GCGTGTTTAACTTGTCTTATCTGGCG    | 26 | 46.2 | 66.5 |   | MYA-839     |
| 27 | <i>Cryptococcus neoformans</i><br>( <i>C. neoformans</i> )                                                                   | F6  | CAACGGATCTCTTGGCTTCCACA       | 23 | 52.2 | 65.9 | 4 | ATCC 90039  |
|    |                                                                                                                              | F7  | TTGAGAGTCATGAAAATCTCAATCCCTCG | 29 | 41.4 | 67.4 |   | ATCC 201110 |
| 28 | <i>Aspergillus fumigatus</i><br>( <i>A. fumigatus</i> )                                                                      | P2  | CCCCTGTCTATCGTACCTTGTGTC      | 24 | 54.2 | 66.6 | 4 | ATCC 01899  |
|    |                                                                                                                              | P3  | TGAACGCTGTTCTGAAAGTATGCAGT    | 26 | 42.3 | 66.9 |   | ATCC 32902  |
|    |                                                                                                                              | P4  | GCCAGCCGACACCCAACTTTATT       | 23 | 52.2 | 66.7 |   | ATCC 32967  |
| 29 | <i>Aspergillus niger</i><br>( <i>A. niger</i> )                                                                              | P5  | CCCATCCGTGTCTATTGTACCCTGT     | 25 | 52.0 | 67.3 | 4 | ATCC 28592  |
|    |                                                                                                                              | P6  | ACACGAACACTGTCTGAAAGCGTG      | 24 | 50.0 | 67.1 |   | ATCC 14113  |
|    |                                                                                                                              | P7  | CCTGCCGACGTTTTCCAACCAT        | 22 | 54.5 | 66.5 |   | ATCC 32267  |
|    |                                                                                                                              |     |                               |    |      |      |   | ATCC 32045  |
|    |                                                                                                                              |     |                               |    |      |      |   | ATCC 24064  |
|    |                                                                                                                              |     |                               |    |      |      |   | ATCC 1022   |
|    |                                                                                                                              |     |                               |    |      |      |   | ATCC 14110  |
|    |                                                                                                                              |     |                               |    |      |      |   | ATCC 32614  |
|    |                                                                                                                              |     |                               |    |      |      |   | ATCC 208996 |
|    |                                                                                                                              |     |                               |    |      |      |   | ATCC 7750   |
|    |                                                                                                                              |     |                               |    |      |      |   | ATCC 16888  |
|    |                                                                                                                              |     |                               |    |      |      |   | ATCC 9508   |
|    |                                                                                                                              |     |                               |    |      |      |   | ATCC 64048  |

**Figure S1.**

**Quantification of PCR-amplified fungus-specific DNA by PCR-DM.**

Fungal DNA amplified from clinical nail samples were quantified via fluorescence intensity as measured by PCR-DM. All samples were prepared in KOH and confirmed by microscopy for fungal elements prior to DNA analysis. KOH+ are samples from patients with onychomycosis(n=106), and KOH- are from non-onychomycosis individuals(n=50). U1-3 are independent fungus universal probes designed to detect all fungi.

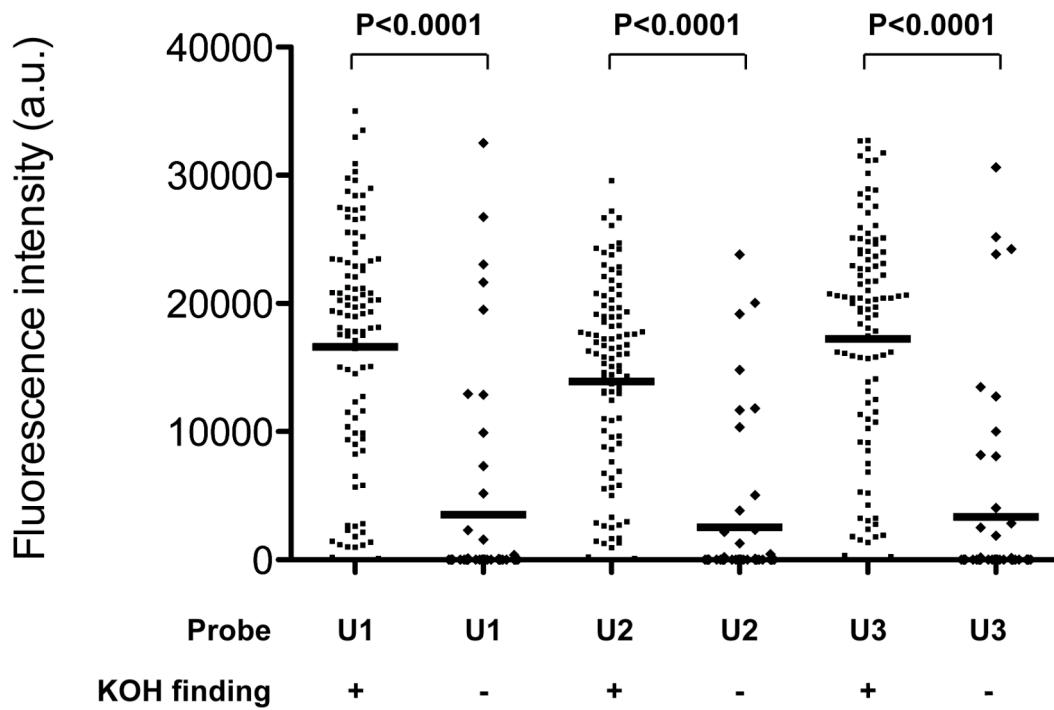

Supplement: supp_48_7_2357__1.pdf [file supp_48_7_2357__1.pdf]
